# Supplementary material for: A Genome-Wide Association Study on Liver Stiffness Changes during Hepatitis C Virus Infection Cure
Source: MDPI journal article supplement (doi:10.3390/diagnostics11081501), 2021-08-20
Supplement: s1 [file s1]

**Table S1.** Direct-acting antiviral regimens used in the study population for achieving sustained viral response (n=242).

| DAA regimen      | Treatment duration | Number (%) |
|------------------|--------------------|------------|
| IFN-based        | 12 weeks           | 8 (3.3)    |
|                  | 24 weeks           | 9 (3.7)    |
|                  | 48 weeks           | 17 (7.0)   |
| LDV/ SOF +/- RBV | 8 weeks            | 10 (4.0)   |
|                  | 12 weeks           | 61 (25.2)  |
|                  | 24 weeks           | 18 (7.4)   |
| SOF /DCV +/-RBV  | 12 weeks           | 23 (9.5)   |
|                  | 24 weeks           | 15 (6.2)   |
| SOF/SMP +/-RBV   | 12 weeks           | 14 (5.8)   |
|                  | 24 weeks           | 5 (2.0)    |
| 3D/2D +/- RBV    | 12 weeks           | 31 (12.8)  |
|                  | 24 weeks           | 5 (2.0)    |
| SOF/VEL          | 12 weeks           | 13 (5.4)   |
| GLE/PIB          | 12 weeks           | 1 (0.4)    |
| EBR/GZR          | 12 weeks           | 6 (2.5)    |
| SOF +/- RBV      | 24 weeks           | 6 (2.5)    |

DAA, direct-acting antiviral; IFN, interferon; LDV, ledipasvir; SOF, sofosbuvir; RBV, ribavirin; DCV, daclatasvir; SMV, simeprevir; 2D/3D, ombitasvir +/- paritaprevir +/- dasabuvir; VEL, velpatasvir; GLE, glecaprevir; PIB, pibrentasvir; GZR, grazoprevir; EBR, elbasvir

**Table S2.** Top 150 genes associated with the percentage of LS changes at SVR time point with respect to the LS value measured at the moment of therapy starting according to MAGMA gene-wise statistics.

| CHR | START     | STOP      | NSNPS | NPARAM | P_SNPWISE_MEAN | GENE                 |
|-----|-----------|-----------|-------|--------|----------------|----------------------|
| 1   | 219297192 | 219436207 | 223   | 18     | 4.07E-05       | <i>LYPLAL1</i>       |
| 9   | 114262002 | 114412135 | 437   | 40     | 6.46E-05       | <i>PTGR1</i>         |
| 14  | 70460934  | 70705787  | 822   | 55     | 7.10E-05       | <i>SLC8A3</i>        |
| 5   | 126153406 | 126416500 | 645   | 25     | 0.00010801     | <i>MARCH3</i>        |
| 9   | 114237439 | 114390124 | 410   | 37     | 0.00011144     | <i>ZNF483</i>        |
| 1   | 20389143  | 20496059  | 261   | 48     | 0.00014326     | <i>PLA2G2D</i>       |
| 14  | 24845738  | 24948731  | 476   | 37     | 0.00019661     | <i>CBLN3</i>         |
| 14  | 24848882  | 24960548  | 530   | 32     | 0.0002234      | <i>KHNYN</i>         |
| 14  | 24858972  | 24962042  | 509   | 32     | 0.00024236     | <i>SDR39U1</i>       |
| 5   | 126328250 | 126459184 | 356   | 19     | 0.00030948     | <i>C5orf63</i>       |
| 1   | 20336157  | 20468394  | 360   | 38     | 0.00031599     | <i>PLA2G5</i>        |
| 9   | 114343632 | 114466631 | 406   | 35     | 0.0003228      | <i>DNAJC25</i>       |
| 17  | 14154367  | 14302721  | 426   | 77     | 0.00044863     | <i>HS3ST3B1</i>      |
| 1   | 75121170  | 75249092  | 338   | 31     | 0.00045145     | <i>CRYZ</i>          |
| 9   | 114343632 | 114482526 | 472   | 41     | 0.00045816     | <i>DNAJC25-GNG10</i> |
| 1   | 20415823  | 20526879  | 227   | 56     | 0.00048393     | <i>PLA2G2F</i>       |
| 9   | 21752635  | 21991040  | 477   | 37     | 0.00057078     | <i>MTAP</i>          |
| 10  | 96393251  | 96545947  | 346   | 19     | 0.00062069     | <i>CYP2C18</i>       |
| 17  | 58627544  | 58793641  | 76    | 21     | 0.00062748     | <i>PPM1D</i>         |
| 16  | 53418351  | 53575560  | 302   | 30     | 0.00070929     | <i>RBL2</i>          |
| 1   | 149862229 | 150032686 | 256   | 27     | 0.00073077     | <i>OTUD7B</i>        |
| 2   | 48707308  | 48875654  | 544   | 40     | 0.00074046     | <i>STON1</i>         |
| 14  | 99127950  | 99234103  | 399   | 43     | 0.00078068     | <i>C14orf177</i>     |
| 2   | 140938996 | 142939270 | 7418  | 174    | 0.00078419     | <i>LRP1B</i>         |
| 20  | 61924662  | 62059487  | 581   | 57     | 0.00085743     | <i>CHRNA4</i>        |
| 14  | 24924712  | 25027471  | 434   | 18     | 0.00085913     | <i>CMA1</i>          |
| 16  | 53475192  | 53588323  | 234   | 31     | 0.000933       | <i>AKTIP</i>         |
| 6   | 142418372 | 142592085 | 356   | 24     | 0.00099038     | <i>VTA1</i>          |
| 10  | 96472463  | 96662671  | 483   | 18     | 0.0010165      | <i>CYP2C19</i>       |
| 16  | 49261828  | 49365742  | 207   | 32     | 0.0010369      | <i>CBLN1</i>         |
| 5   | 127543601 | 127923735 | 1001  | 39     | 0.001066       | <i>FBN2</i>          |
| 1   | 75148836  | 75282361  | 386   | 25     | 0.0011314      | <i>TYW3</i>          |
| 8   | 15347596  | 15674158  | 1348  | 48     | 0.0011779      | <i>TUSC3</i>         |
| 4   | 99341518  | 99629812  | 698   | 70     | 0.0012095      | <i>TSPAN5</i>        |
| 6   | 138487123 | 138589627 | 290   | 20     | 0.0012447      | <i>PBOV1</i>         |
| 14  | 24817992  | 24938494  | 457   | 43     | 0.0012659      | <i>NYNRIN</i>        |
| 9   | 106806213 | 106953700 | 524   | 19     | 0.0012704      | <i>SMC2</i>          |
| 8   | 16800334  | 16909674  | 491   | 45     | 0.0013031      | <i>FGF20</i>         |
| 1   | 200559935 | 200689126 | 455   | 32     | 0.0013755      | <i>DDX59</i>         |

|    |           |           |      |     |           |                      |
|----|-----------|-----------|------|-----|-----------|----------------------|
| 15 | 88369948  | 88850026  | 1016 | 82  | 0.0013989 | <i>NTRK3</i>         |
| 12 | 89763495  | 89970039  | 484  | 32  | 0.0015496 | <i>POC1B</i>         |
| 12 | 13077798  | 13203243  | 312  | 35  | 0.0015641 | <i>HEBP1</i>         |
| 22 | 30834877  | 30951698  | 410  | 28  | 0.0015919 | <i>SEC14L4</i>       |
| 17 | 58470520  | 58653580  | 107  | 23  | 0.0016302 | <i>APPBP2</i>        |
| 2  | 74070093  | 74196780  | 338  | 40  | 0.0016965 | <i>ACTG2</i>         |
| 10 | 96648350  | 96799486  | 510  | 23  | 0.0019189 | <i>CYP2C9</i>        |
| 16 | 11317141  | 11417452  | 384  | 28  | 0.0019959 | <i>PRM3</i>          |
| 12 | 109665783 | 109797025 | 260  | 37  | 0.002055  | <i>FOXN4</i>         |
| 2  | 48707064  | 49053656  | 1219 | 73  | 0.0021331 | <i>STON1-GTF2A1L</i> |
| 16 | 11319493  | 11420337  | 387  | 28  | 0.0021554 | <i>PRM2</i>          |
| 12 | 109504222 | 109756031 | 588  | 51  | 0.0021699 | <i>ACACB</i>         |
| 3  | 9389384   | 9569838   | 375  | 40  | 0.00221   | <i>SETD5</i>         |
| 4  | 146490540 | 146631187 | 345  | 31  | 0.0022234 | <i>MMAA</i>          |
| 5  | 126062315 | 126222712 | 497  | 41  | 0.0022235 | <i>LMNB1</i>         |
| 16 | 11311714  | 11413160  | 382  | 30  | 0.0022416 | <i>TNP2</i>          |
| 2  | 159601829 | 159722506 | 375  | 30  | 0.0023945 | <i>DAPL1</i>         |
| 3  | 9490045   | 9645486   | 371  | 38  | 0.0024653 | <i>LHFPL4</i>        |
| 9  | 114373851 | 114482526 | 373  | 33  | 0.0025672 | <i>GNG10</i>         |
| 1  | 149821110 | 149922348 | 108  | 19  | 0.0026943 | <i>BOLA1</i>         |
| 1  | 149824870 | 149939434 | 120  | 21  | 0.0027027 | <i>SV2A</i>          |
| 11 | 117657691 | 117798201 | 375  | 63  | 0.0027503 | <i>FXVD6</i>         |
| 9  | 109995517 | 110144475 | 487  | 31  | 0.0027675 | <i>RAD23B</i>        |
| 1  | 149808525 | 149908961 | 104  | 18  | 0.0027975 | <i>HIST2H2AC</i>     |
| 1  | 149806010 | 149908232 | 104  | 18  | 0.0027975 | <i>HIST2H2BE</i>     |
| 1  | 149809019 | 149909466 | 104  | 18  | 0.0027975 | <i>HIST2H2AB</i>     |
| 22 | 30793946  | 30918034  | 403  | 33  | 0.0028024 | <i>SEC14L3</i>       |
| 1  | 149845209 | 149951449 | 130  | 17  | 0.0028054 | <i>SF3B4</i>         |
| 1  | 149850543 | 149958791 | 134  | 16  | 0.0028565 | <i>MTMR11</i>        |
| 11 | 117640790 | 117749408 | 265  | 52  | 0.0029011 | <i>FXVD2</i>         |
| 6  | 99767279  | 99892082  | 328  | 24  | 0.0029045 | <i>COQ3</i>          |
| 16 | 11324693  | 11425192  | 384  | 26  | 0.0029266 | <i>PRM1</i>          |
| 5  | 6583500   | 6719675   | 529  | 39  | 0.002944  | <i>SRD5A1</i>        |
| 7  | 133762105 | 133998933 | 521  | 24  | 0.0029505 | <i>LRGUK</i>         |
| 3  | 195245573 | 195361076 | 336  | 38  | 0.0030623 | <i>APOD</i>          |
| 5  | 110781731 | 110898234 | 227  | 36  | 0.003199  | <i>STARD4</i>        |
| 16 | 11298274  | 11400039  | 366  | 34  | 0.0032347 | <i>SOCS1</i>         |
| 12 | 27347078  | 27528892  | 519  | 29  | 0.0033337 | <i>STK38L</i>        |
| 1  | 112888800 | 113053786 | 383  | 41  | 0.0035789 | <i>CTTNBP2NL</i>     |
| 15 | 42817857  | 43063196  | 273  | 26  | 0.0035848 | <i>STARD9</i>        |
| 12 | 122664111 | 122801068 | 217  | 27  | 0.0036172 | <i>VPS33A</i>        |
| 21 | 36110098  | 36471595  | 780  | 102 | 0.0036895 | <i>RUNX1</i>         |
| 2  | 43989611  | 44116039  | 553  | 36  | 0.0036942 | <i>ABCG5</i>         |
| 20 | 61981561  | 62153993  | 771  | 62  | 0.0039287 | <i>KCNQ2</i>         |
| 2  | 44016103  | 44155947  | 551  | 40  | 0.0039946 | <i>ABCG8</i>         |
| 12 | 123187371 | 123305953 | 267  | 28  | 0.004067  | <i>DENR</i>          |

|    |           |           |      |    |           |                    |
|----|-----------|-----------|------|----|-----------|--------------------|
| 14 | 92384243  | 92556484  | 498  | 27 | 0.004216  | <i>TRIP11</i>      |
| 16 | 60342359  | 60443667  | 292  | 46 | 0.0042296 | <i>LOC729159</i>   |
| 12 | 105674414 | 105815296 | 448  | 37 | 0.0043121 | <i>C12orf75</i>    |
| 11 | 117721356 | 117850168 | 324  | 48 | 0.0045032 | <i>TMPRSS13</i>    |
| 1  | 149780749 | 149882776 | 74   | 16 | 0.0046375 | <i>HIST2H4B</i>    |
| 12 | 27074503  | 27217360  | 348  | 37 | 0.0046565 | <i>TM7SF3</i>      |
| 12 | 27041305  | 27169581  | 290  | 41 | 0.0046793 | <i>FGFR1OP2</i>    |
| 3  | 135634515 | 135916752 | 383  | 24 | 0.0049738 | <i>PPP2R3A</i>     |
| 14 | 92474896  | 92622965  | 496  | 22 | 0.0049889 | <i>ATXN3</i>       |
| 12 | 13043407  | 13156828  | 283  | 45 | 0.0052286 | <i>GPRC5D</i>      |
| 15 | 42965760  | 43079417  | 140  | 18 | 0.0052726 | <i>CDAN1</i>       |
| 2  | 46474541  | 46663842  | 575  | 67 | 0.0053659 | <i>EPAS1</i>       |
| 6  | 99796534  | 99923263  | 330  | 25 | 0.0053878 | <i>PNISR</i>       |
| 19 | 53920989  | 54047546  | 730  | 67 | 0.0054059 | <i>ZNF813</i>      |
| 22 | 30771611  | 30875041  | 309  | 28 | 0.005436  | <i>MTFP1</i>       |
| 20 | 37051486  | 37257504  | 331  | 32 | 0.0054567 | <i>RALGAPB</i>     |
| 3  | 164646686 | 164846283 | 330  | 21 | 0.0054832 | <i>SI</i>          |
| 3  | 139121726 | 139249662 | 320  | 16 | 0.0055035 | <i>RBP2</i>        |
| 2  | 96941062  | 97044091  | 102  | 20 | 0.005626  | <i>ITPRIPL1</i>    |
| 11 | 13249325  | 13458813  | 499  | 43 | 0.0057121 | <i>ARNTL</i>       |
| 19 | 58587695  | 58716477  | 386  | 30 | 0.0057171 | <i>ZNF329</i>      |
| 18 | 5839411   | 5945373   | 286  | 52 | 0.0057895 | <i>TMEM200C</i>    |
| 9  | 99353109  | 99467603  | 96   | 26 | 0.0059402 | <i>AAED1</i>       |
| 1  | 74983795  | 75189422  | 386  | 48 | 0.0060059 | <i>ERICH3</i>      |
| 12 | 85380099  | 85708235  | 404  | 26 | 0.0061015 | <i>LRR1Q1</i>      |
| 12 | 27125455  | 27233606  | 300  | 28 | 0.0062882 | <i>MED21</i>       |
| 6  | 7540432   | 7662200   | 365  | 43 | 0.0063644 | <i>SNRNP48</i>     |
| 14 | 54366454  | 54473554  | 246  | 39 | 0.0063662 | <i>BMP4</i>        |
| 11 | 117640790 | 117797746 | 418  | 63 | 0.0064146 | <i>FXVD6-FXVD2</i> |
| 14 | 88801982  | 88954804  | 256  | 23 | 0.0064947 | <i>SPATA7</i>      |
| 15 | 42980928  | 43263037  | 283  | 28 | 0.0065181 | <i>TTBK2</i>       |
| 2  | 74006043  | 74150783  | 272  | 33 | 0.0065193 | <i>STAMBP</i>      |
| 2  | 96951479  | 97092833  | 154  | 21 | 0.0067003 | <i>NCAPH</i>       |
| 9  | 104303897 | 104407283 | 281  | 26 | 0.0067438 | <i>PPP3R2</i>      |
| 13 | 23705060  | 23949304  | 1200 | 71 | 0.0068936 | <i>SGCG</i>        |
| 11 | 48235413  | 48336330  | 328  | 17 | 0.0069572 | <i>OR4X1</i>       |
| 1  | 32429295  | 32576460  | 158  | 28 | 0.0069693 | <i>KHDRBS1</i>     |
| 3  | 136005077 | 136521245 | 713  | 25 | 0.0071261 | <i>STAG1</i>       |
| 4  | 38615790  | 38753129  | 426  | 36 | 0.0071445 | <i>KLF3</i>        |
| 1  | 117636209 | 117803582 | 398  | 45 | 0.0071531 | <i>VTCN1</i>       |
| 19 | 58545204  | 58679793  | 408  | 29 | 0.0071604 | <i>ZSCAN18</i>     |
| 12 | 32828195  | 32958895  | 453  | 25 | 0.0072134 | <i>YARS2</i>       |
| 11 | 48277775  | 48378704  | 254  | 20 | 0.0072264 | <i>OR4S1</i>       |
| 11 | 100850355 | 101050544 | 633  | 36 | 0.0073052 | <i>PGR</i>         |
| 19 | 10897304  | 11030466  | 170  | 26 | 0.007326  | <i>C19orf38</i>    |
| 4  | 76872623  | 76978641  | 339  | 18 | 0.0073277 | <i>CXCL9</i>       |

|    |           |           |     |    |           |                   |
|----|-----------|-----------|-----|----|-----------|-------------------|
| 1  | 16334264  | 16450127  | 508 | 39 | 0.0073361 | <i>FAM131C</i>    |
| 11 | 48296493  | 48397482  | 202 | 19 | 0.0073388 | <i>OR4C3</i>      |
| 9  | 104246131 | 104375626 | 320 | 29 | 0.0073757 | <i>RNF20</i>      |
| 1  | 32662818  | 32764461  | 112 | 23 | 0.0074535 | <i>FAM167B</i>    |
| 3  | 135817760 | 135965522 | 145 | 21 | 0.0074553 | <i>MSL2</i>       |
| 2  | 38843052  | 39011909  | 384 | 41 | 0.0074621 | <i>GALM</i>       |
| 1  | 149774181 | 149874687 | 66  | 13 | 0.0075391 | <i>HIST2H3A</i>   |
| 2  | 220442292 | 220556702 | 135 | 33 | 0.007568  | <i>SLC4A3</i>     |
| 2  | 121443441 | 121800229 | 885 | 81 | 0.007618  | <i>GLI2</i>       |
| 5  | 134620071 | 134785645 | 291 | 43 | 0.0078287 | <i>H2AFY</i>      |
| 22 | 30742930  | 30871291  | 385 | 31 | 0.0078979 | <i>SEC14L2</i>    |
| 8  | 30446117  | 30553473  | 197 | 25 | 0.0080259 | <i>SMIM18</i>     |
| 5  | 6549352   | 6683473   | 615 | 45 | 0.0080348 | <i>NSUN2</i>      |
| 1  | 149772628 | 149873161 | 64  | 13 | 0.0080366 | <i>HIST2H2AA4</i> |
| 3  | 57211765  | 57357499  | 226 | 22 | 0.0080378 | <i>APPL1</i>      |
| 4  | 76892269  | 76994689  | 389 | 18 | 0.0080749 | <i>CXCL10</i>     |
| 3  | 57181866  | 57311656  | 190 | 21 | 0.0080785 | <i>HESX1</i>      |
| 9  | 98947588  | 99114662  | 490 | 47 | 0.008083  | <i>HSD17B3</i>    |
| 12 | 10095660  | 10203381  | 378 | 33 | 0.0080938 | <i>CLEC1B</i>     |

CHR, Chromosome; BP, base pair position according to UCSC genome browser (NCBI37/hg19) and dbSNP build 150; NSNPS, number of SNPs in the gene region; NPARAM, number of SNPs used in the analysis.
